# Supplementary material for: Gamma-Ray-Induced Amino Acid Formation in Aqueous Small Bodies in the Early Solar System
Source: PubMed Central journal article supplement (PMC9801502; doi:10.1021/acscentsci.2c00588), 2022-12-07
Supplement: oc2c00588_si_001.pdf [file oc2c00588_si_001.pdf]

## Supporting Information

### Gamma-ray-induced amino acid formation in aqueous small bodies in the early solar system

Yoko Kebukawa<sup>1\*</sup>, Shinya Asano<sup>1</sup>, Atsushi Tani<sup>2</sup>, Isao Yoda<sup>3</sup>, and Kensei Kobayashi<sup>1</sup>

<sup>1</sup>Department of Chemistry and Life Science, Yokohama National University, 79-5 Tokiwadai, Hodogaya-ku, Yokohama, Kanagawa, 240-8501, Japan

<sup>2</sup>Graduate School of Human Development and Environment, Kobe University, 3-11 Tsurukabuto, Nada-ku, Kobe, Hyogo, 657-8501, Japan

<sup>3</sup>Co60 irradiation facility, Laboratory for Zero-Carbon Energy, Institute of Innovative Research, Tokyo Institute of Technology, 2-12-1 Ookayama, Meguro-ku, Tokyo, 152-8550, Japan

\*Corresponding author email: [kebukawa@ynu.ac.jp](mailto:kebukawa@ynu.ac.jp)

#### Supplementary figures and table

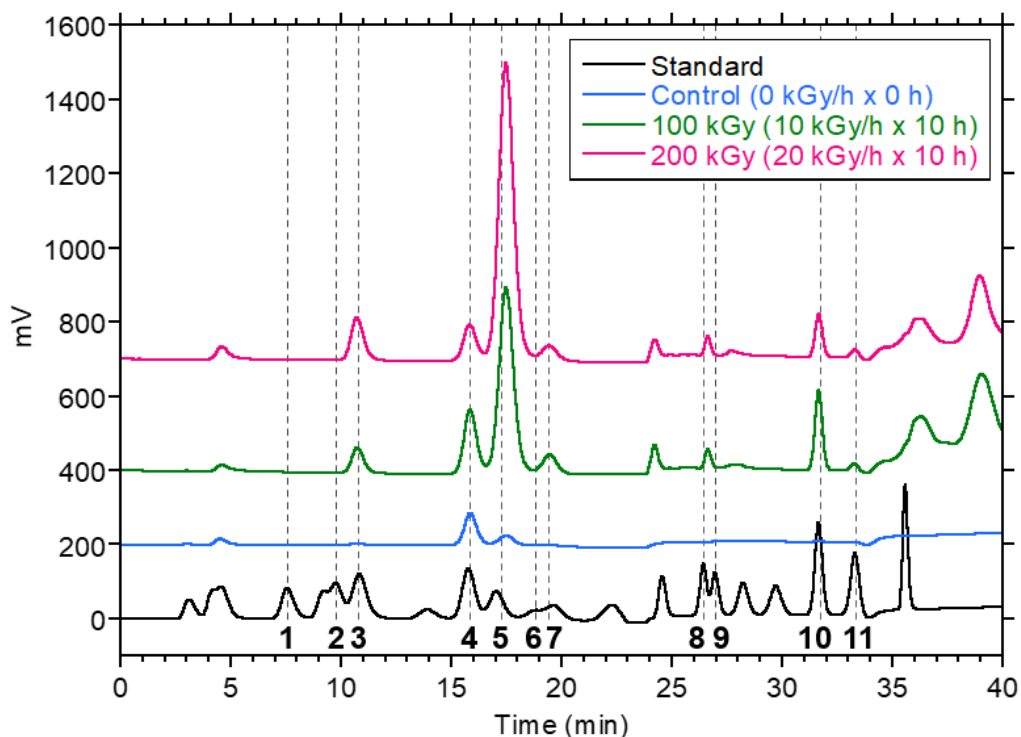

Supplementary figure 1: Typical HPLC chromatograms of gamma-ray irradiated samples ( $10 \text{ kGy h}^{-1} \times 10 \text{ h}$  and  $20 \text{ kGy h}^{-1} \times 10 \text{ h}$ ), control, and amino acid standard. 1: Aspartic acid, 2: Serine, 3: Glutamic acid, 4: Glycine, 5: Alanine, 6:  $\alpha$ -aminoisobutyric acid, 7:  $\alpha$ -aminobutyric acid, 8: Isoleucine, 9: Leucine, 10:  $\beta$ -alanine, 11:  $\beta$ -aminoisobutyric acid.

Supplementary table 1: Yields of amino acids by gamma-ray irradiations to the aqueous solutions of formaldehyde and ammonia.

| Amino acid concentrations in $\mu\text{M}$                      | Glycine | Alanine | $\beta$ -alanine | $\alpha$ -aminobutyric acid | $\alpha$ -aminoisobutyric acid | $\beta$ -aminoisobutyric acid | Leucine | Isoleucine | Serine | Aspartic acid | Glutamic acid | Total |
|-----------------------------------------------------------------|---------|---------|------------------|-----------------------------|--------------------------------|-------------------------------|---------|------------|--------|---------------|---------------|-------|
| 0 kGy (Control)                                                 | 14.3    | 3.6     |                  |                             |                                |                               |         |            |        |               |               | 18.0  |
| 0 kGy (Control)                                                 | 6.4     | 14.6    |                  |                             |                                |                               |         |            |        |               | 1.4           | 22.4  |
| 0 kGy (Control)                                                 | 19.0    | 11.4    | 0.3              |                             |                                |                               |         |            |        |               | 1.0           | 31.7  |
| 8.5 kGy ( $0.5 \text{ kGy h}^{-1} \times 17 \text{ h}$ )        | 38.7    | 49.5    |                  |                             |                                |                               |         |            |        |               |               | 88.1  |
| 17 kGy ( $0.5 \text{ kGy h}^{-1} \times 34 \text{ h}$ )         | 27.8    | 84.2    |                  |                             |                                |                               |         |            | 2.5    |               |               | 114.5 |
| 25 kGy ( $0.5 \text{ kGy h}^{-1} \times 50 \text{ h}$ )         | 34.4    | 110.2   |                  |                             |                                |                               |         |            | 9.0    |               |               | 153.6 |
| 7.5 kGy ( $1.5 \text{ kGy h}^{-1} \times 5 \text{ h}$ ) #1      | 15.6    | 43.9    | 2.0              | 4.9                         |                                | 0.3                           | 1.1     | 1.0        |        | 0.3           | 3.5           | 72.5  |
| 7.5 kGy ( $1.5 \text{ kGy h}^{-1} \times 5 \text{ h}$ ) #2      | 42.4    | 33.5    | 0.6              | 3.3                         |                                |                               | 1.3     |            |        |               | 2.5           | 83.6  |
| 7.5 kGy ( $1.5 \text{ kGy h}^{-1} \times 5 \text{ h}$ ) #3      | 20.6    | 32.5    | 1.2              | 3.1                         |                                |                               | 0.7     |            |        |               | 2.6           | 60.7  |
| Average 7.5 kGy ( $1.5 \text{ kGy h}^{-1} \times 5 \text{ h}$ ) | 26.2    | 36.6    | 1.2              | 3.8                         |                                | tr.                           | 1.1     | tr.        |        | tr.           | 2.9           | 72.3  |
| Standard deviation                                              | 14.2    | 6.3     | 0.7              | 1.0                         |                                |                               | 0.3     |            |        |               | 0.5           | 11.5  |
| 12 kGy ( $1.5 \text{ kGy h}^{-1} \times 8 \text{ h}$ )          | 29.4    | 7.3     |                  |                             |                                |                               |         |            |        |               | 0.6           | 37.2  |
| 15 kGy ( $1.5 \text{ kGy h}^{-1} \times 10 \text{ h}$ )         | 25.9    | 7.0     | tr.              |                             |                                |                               |         |            |        |               | 0.7           | 33.6  |
| 24 kGy ( $1.5 \text{ kGy h}^{-1} \times 16 \text{ h}$ )         | 18.9    | 177.6   | 4.6              | 21.8                        |                                |                               |         | 4.4        |        |               | 21.9          | 249.1 |
| 30 kGy ( $1.5 \text{ kGy h}^{-1} \times 20 \text{ h}$ )         | 14.0    | 205.9   | 5.9              | 20.6                        |                                | 2.1                           |         | tr.        |        |               | 25.8          | 274.3 |
| 7.5 kGy ( $2.5 \text{ kGy h}^{-1} \times 3 \text{ h}$ ) #1      | 39.6    | 55.8    | 1.0              | 4.2                         |                                |                               | 1.9     | 0.3        |        |               | 3.9           | 106.7 |
| 7.5 kGy ( $2.5 \text{ kGy h}^{-1} \times 3 \text{ h}$ ) #2      | 83.9    | 63.8    | 1.8              | 6.3                         |                                |                               | 2.0     |            |        |               | 5.8           | 163.5 |
| 7.5 kGy ( $2.5 \text{ kGy h}^{-1} \times 3 \text{ h}$ ) #3      | 79.9    | 55.2    | 2.3              | 6.9                         |                                |                               | 1.6     |            |        |               | 4.9           | 150.9 |
| Average 7.5 kGy ( $2.5 \text{ kGy h}^{-1} \times 3 \text{ h}$ ) | 67.8    | 58.2    | 1.7              | 5.8                         |                                |                               | 1.8     | tr.        |        |               | 4.8           | 140.3 |
| Standard deviation                                              | 24.5    | 4.8     | 0.6              | 1.4                         |                                |                               | 0.2     |            |        |               | 0.9           | 29.8  |
| 7.5 kGy ( $3 \text{ kGy h}^{-1} \times 2.5 \text{ h}$ )         | 21.6    | 30.0    | tr.              |                             |                                |                               |         |            | tr.    |               | 2.7           | 54.2  |
| 12 kGy ( $3 \text{ kGy h}^{-1} \times 4 \text{ h}$ )            | 56.6    | 56.7    | tr.              |                             | 9.1                            | 7.2                           |         |            |        |               | 5.5           | 135.1 |
| 15 kGy ( $3 \text{ kGy h}^{-1} \times 5 \text{ h}$ ) #1         | 17.5    | 101.3   | 6.3              | 11.6                        |                                | 0.9                           | 3.2     | 0.8        |        |               | 8.4           | 150.0 |
| 15 kGy ( $3 \text{ kGy h}^{-1} \times 5 \text{ h}$ ) #2         | 139.8   | 85.9    |                  | 10.5                        |                                |                               | 4.7     | 3.3        |        |               | 7.1           | 251.3 |
| 15 kGy ( $3 \text{ kGy h}^{-1} \times 5 \text{ h}$ ) #3         | 15.2    | 82.2    | 5.8              | 12.5                        |                                | 0.2                           | 3.3     |            |        |               | 8.0           | 127.3 |
| Average 15 kGy ( $3 \text{ kGy h}^{-1} \times 5 \text{ h}$ )    | 57.5    | 89.8    | 6.0              | 11.5                        |                                | 0.6                           | 3.7     | 2.0        |        |               | 7.8           | 176.2 |
| Standard deviation                                              | 71.3    | 10.1    |                  | 1.0                         |                                |                               | 0.9     |            |        |               | 0.7           | 66.0  |
| 24 kGy ( $3 \text{ kGy h}^{-1} \times 8 \text{ h}$ )            | 20.6    | 250.8   | 7.2              | 30.9                        |                                | 2.8                           |         | 7.0        |        |               | 32.0          | 351.2 |
| 30 kGy ( $3 \text{ kGy h}^{-1} \times 10 \text{ h}$ )           | 22.0    | 390.1   | 12.3             | 48.2                        |                                | 4.0                           |         | 11.8       |        |               | 49.4          | 537.8 |
| 15 kGy ( $5 \text{ kGy h}^{-1} \times 3 \text{ h}$ )            | 13.6    | 225.0   | 5.9              | 24.0                        |                                | 2.0                           |         | 3.6        |        |               | 24.3          | 298.5 |

|                                         |      |        |      |       |      |      |       |       |
|-----------------------------------------|------|--------|------|-------|------|------|-------|-------|
| 25 kGy (5 kGy h <sup>-1</sup> × 5 h)    | 22.8 | 359.9  | 9.4  | 45.1  | 3.2  | 9.6  | 49.6  | 499.6 |
| 50 kGy (5 kGy h <sup>-1</sup> × 10 h)   | 25.1 | 568.1  | 21.3 | 69.8  | 6.6  | 11.7 | 58.1  | 760.7 |
| 30 kGy (10 kGy h <sup>-1</sup> × 3 h)   | 25.5 | 351.3  | 10.2 | 47.8  | 3.0  | 9.6  | 47.4  | 494.7 |
| 50 kGy (10 kGy h <sup>-1</sup> × 5 h)   | 42.5 | 459.2  | 22.8 | 76.1  | 5.0  | 13.9 | 53.4  | 673.0 |
| 100 kGy (10 kGy h <sup>-1</sup> × 10 h) | 70.7 | 411.2  | 48.3 | 120.2 | 6.9  | 17.7 | 43.0  | 718.0 |
| 60 kGy (20 kGy h <sup>-1</sup> × 3 h)   | 37.0 | 564.8  | 21.9 | 72.3  | 5.1  | 13.9 | 61.8  | 776.8 |
| 100 kGy (20 kGy h <sup>-1</sup> × 5 h)  | 65.5 | 381.6  | 42.3 | 110.5 | 6.2  | 15.3 | 37.8  | 659.1 |
| 200 kGy (20 kGy h <sup>-1</sup> × 10 h) | 65.3 | 1313.2 | 51.8 | 160.8 | 15.1 | 35.0 | 155.8 | 1797  |
| 80 °C 24 h (without gamma-ray)          | 14.6 | 0.9    |      |       |      |      |       | 15.5  |

tr.: Trace amount were detected but not suitable for quantification.

Blank: not detected.

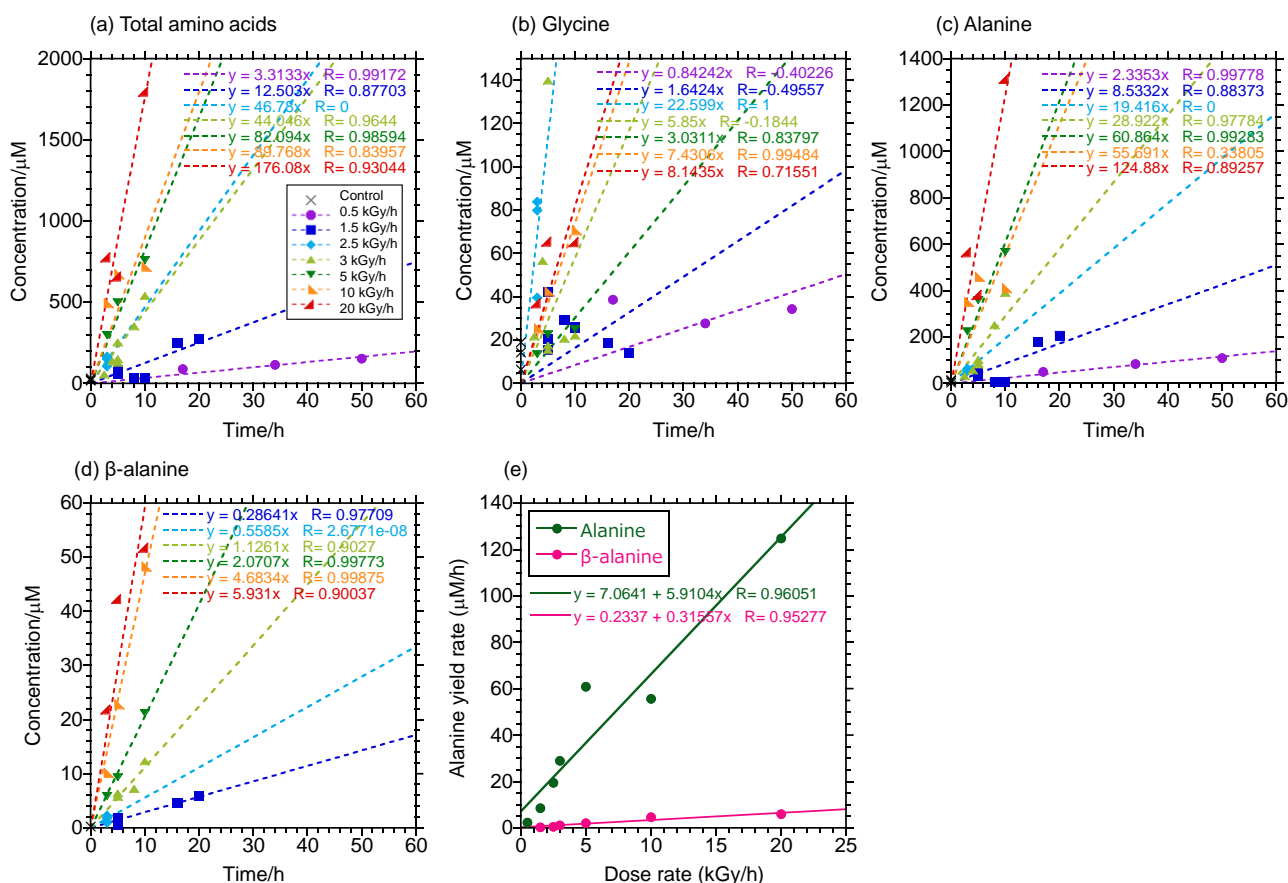

Supplementary figure 2: (a) Total amino acid yield as a function of irradiation time for each gamma-ray dose rate. (b) Glycine yield as a function of irradiation time for each gamma-ray dose rate. (c) Alanine yield as a function of irradiation time for each gamma-ray dose rate. (d)  $\beta$ -alanine yield as a function of irradiation time for each gamma-ray dose rate. (e) Plot of the alanine and  $\beta$ -alanine yield rates as functions of gamma-ray dose rate obtained from the linear approximations reported in (c, d).

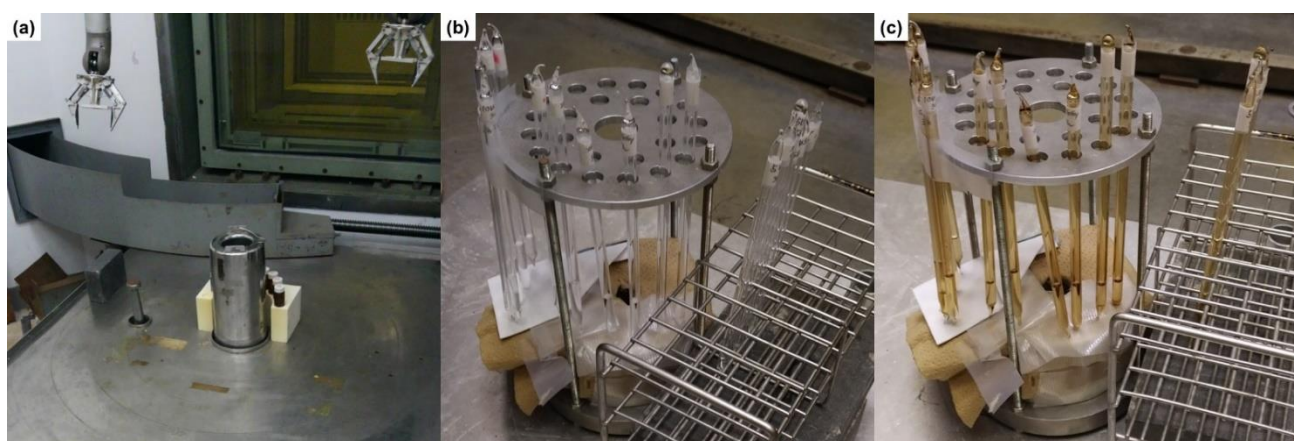

Supplementary figure 3: (a) The  $^{60}\text{Co}$  facility at Tokyo Institute of Technology. (b,c) Sample solutions in glass tubes (b) before and (c) after the gamma-ray irradiation at the  $^{60}\text{Co}$  facility (Rabbit11) in the Institute of Scientific and Industrial Research, Osaka University. The samples turned brown by gamma-ray.

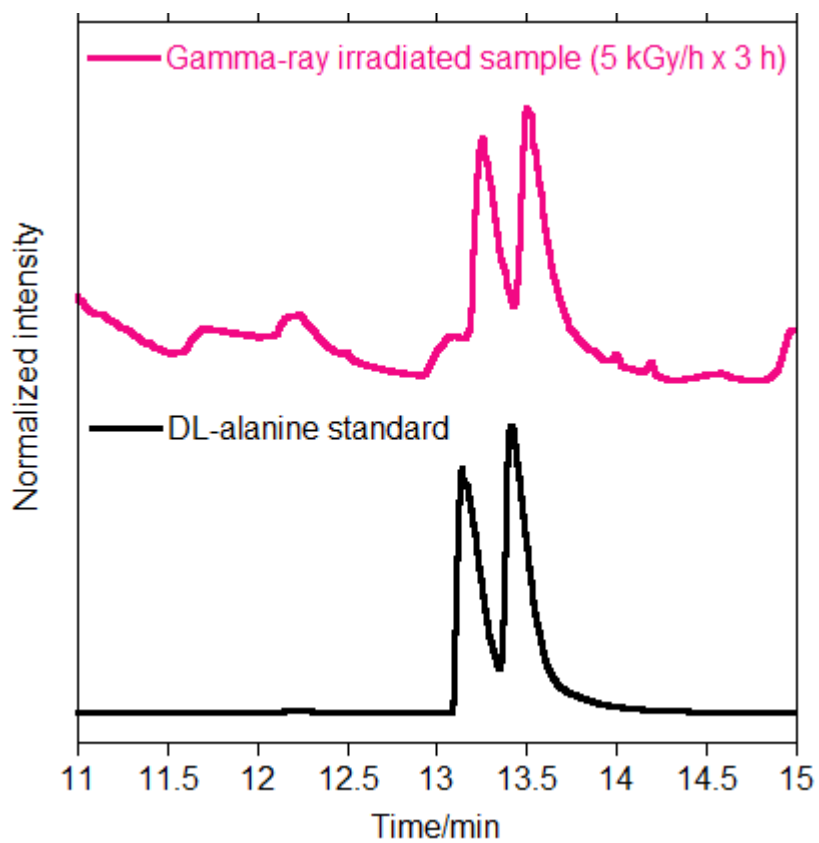

Supplementary figure 4: GC/MS chromatograms of gamma-ray irradiated sample ( $5 \text{ kGy h}^{-1} \times 3 \text{ h}$ ) and DL-alanine standard at  $m/z = 116$ .
